# Supplementary material
Source: Royal Society of Chemistry journal article supplement (doi:10.1039/d6fo02097f)

# **Linkage-dependent effects of procyanidin dimers on TNF $\alpha$ -mediated intestinal epithelial barrier dysfunction, redox homeostasis and inflammation**

## **Uncropped images for Western blot**

**Treatment group:**

**C : Control**

**T : TNF $\alpha$**

**A1 : 1  $\mu$ M**

**A2 : 1  $\mu$ M**

**B1 : 1  $\mu$ M**

**B2 : 1  $\mu$ M**

**The image with red rectangle is the image used in the paper**

**Fig. 3A, C**

**6 h samples**

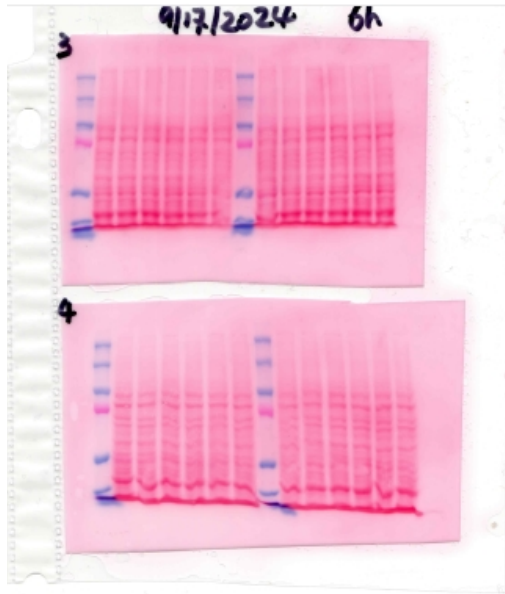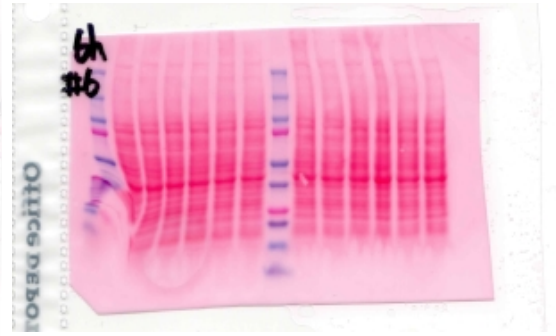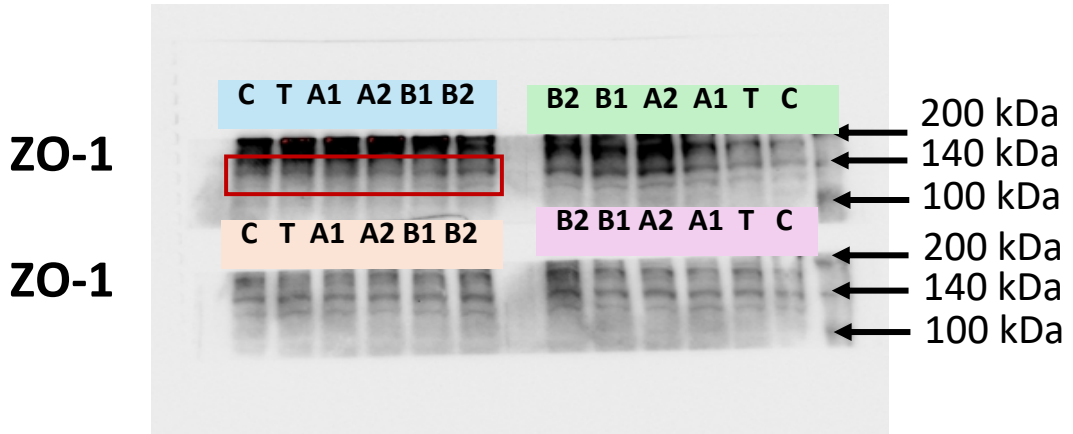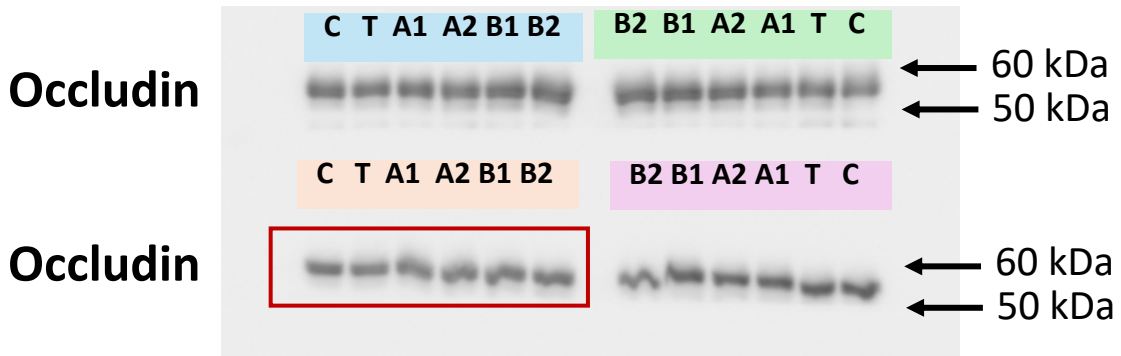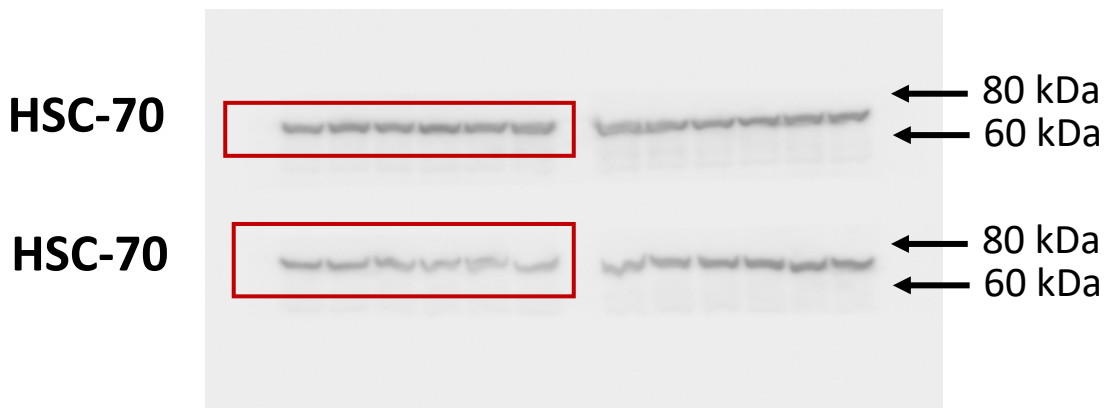

# Figure 5A

5 min samples

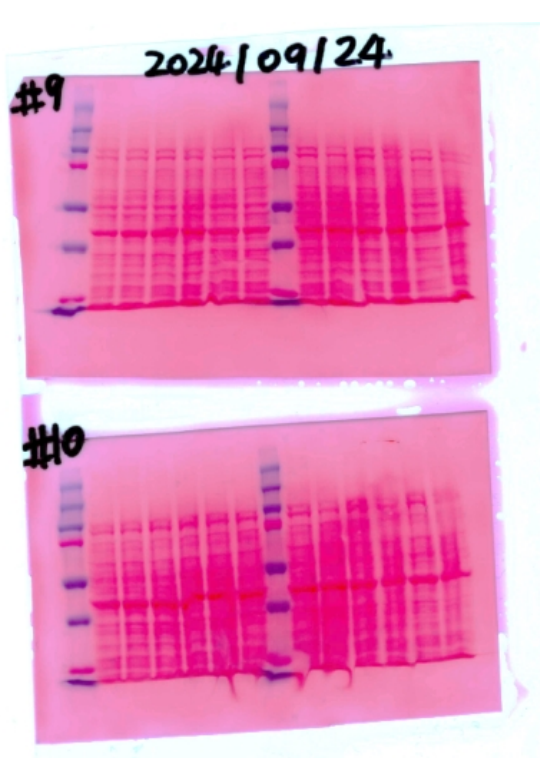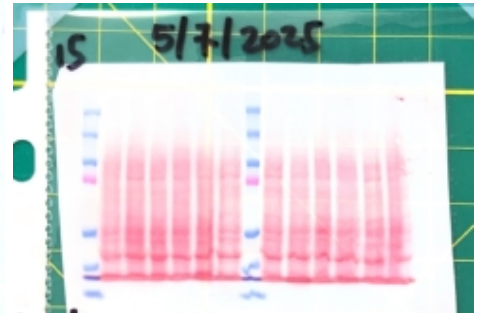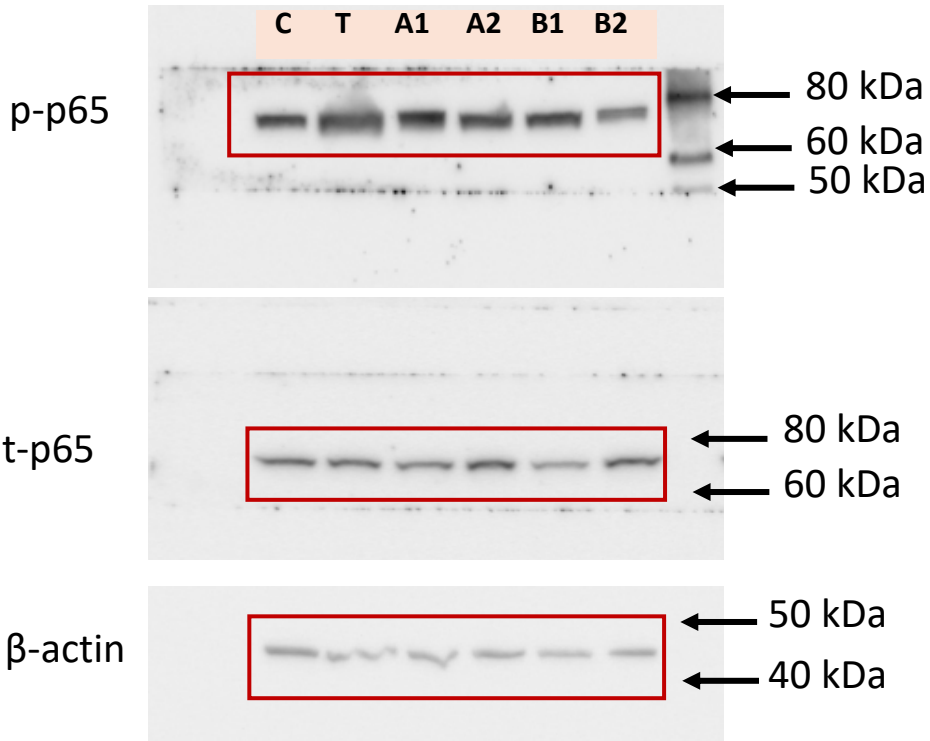

# Fig. 6C

## 3 h samples

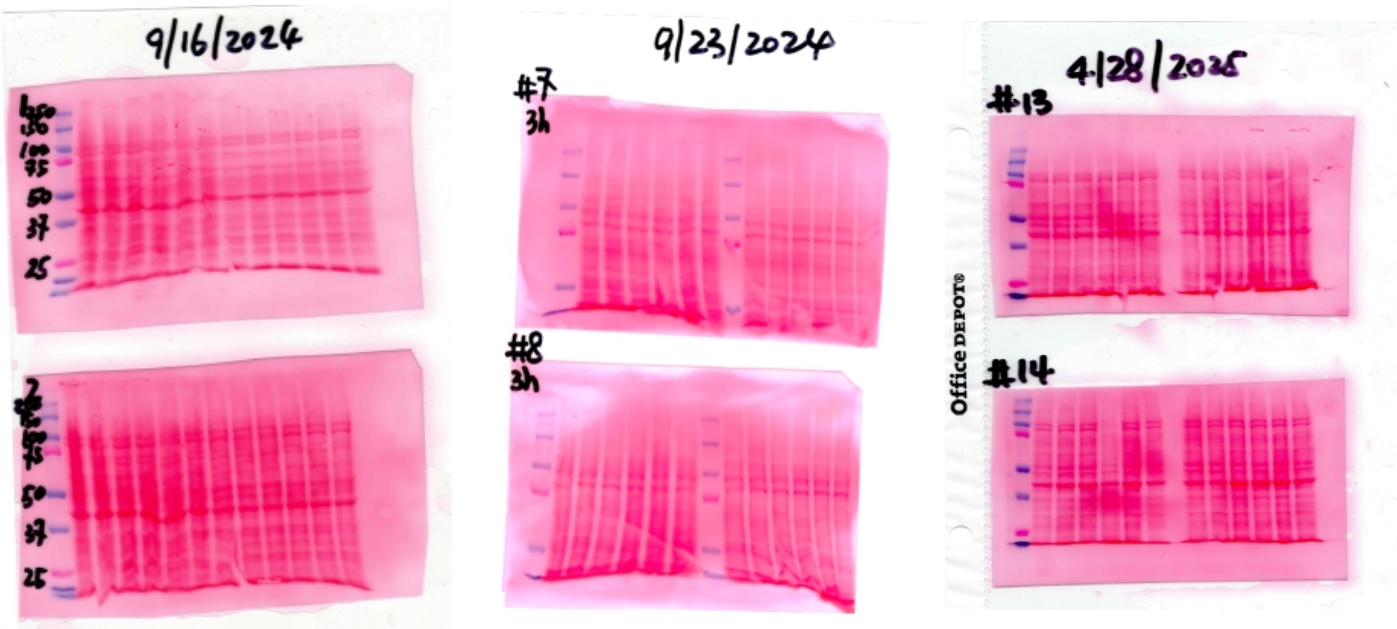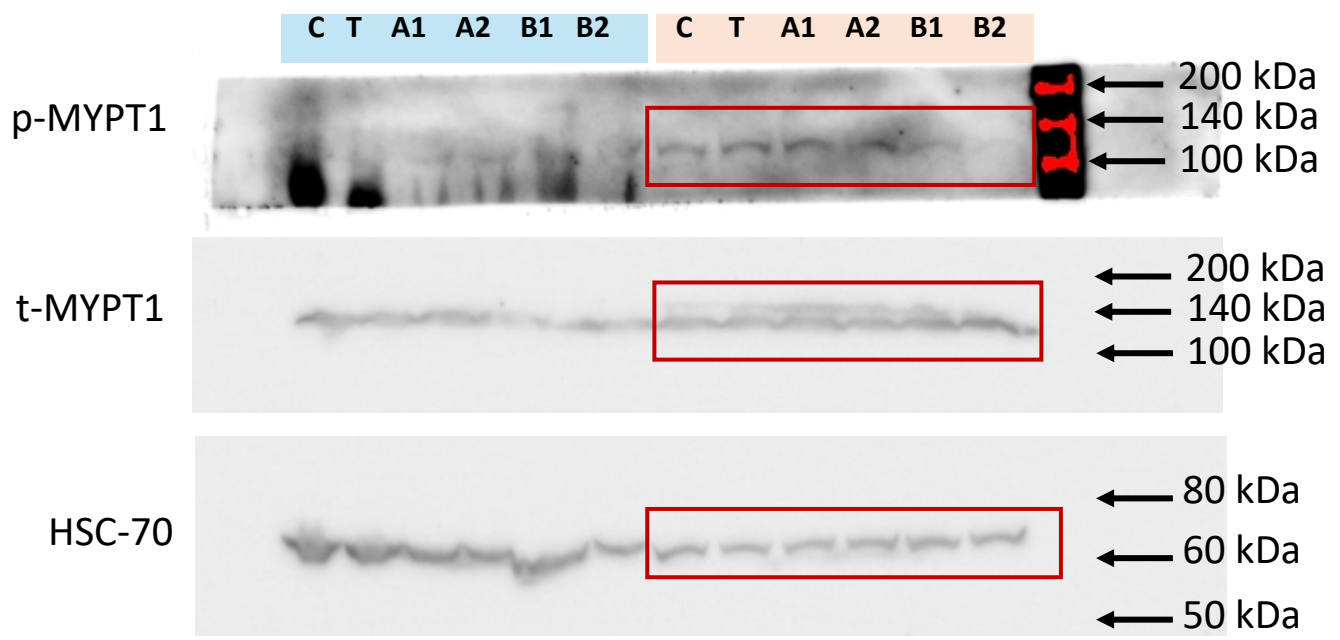



**Fig. 6E**

**3 h samples**

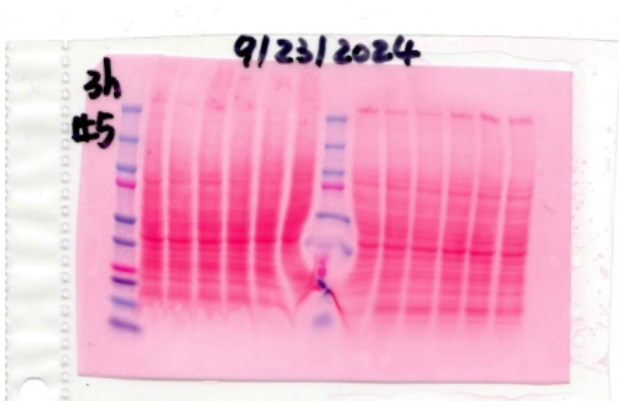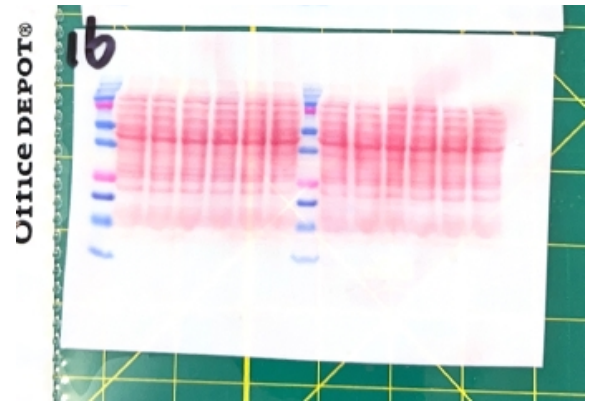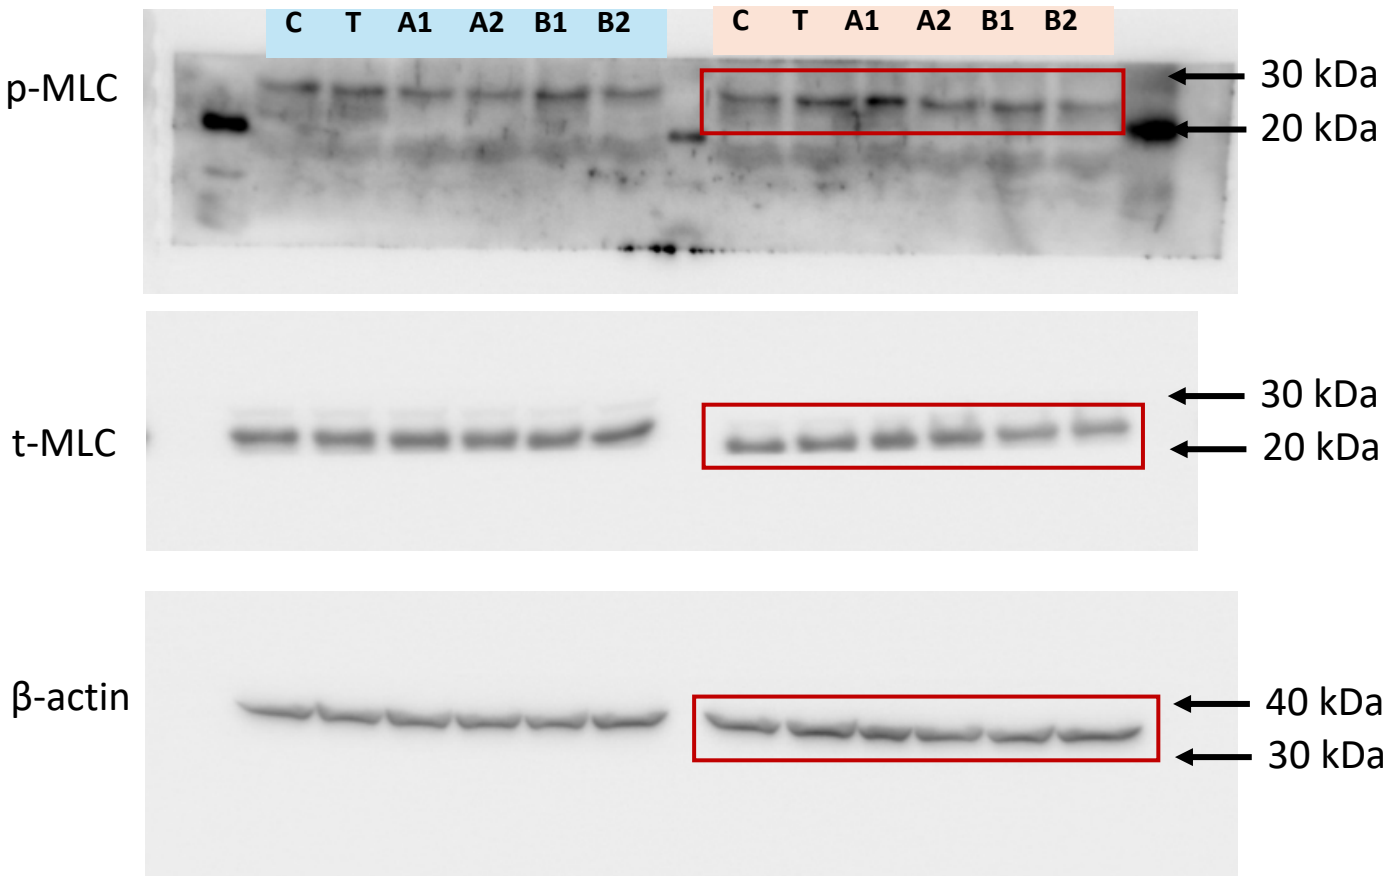

Supplement: d6fo02097f2.pdf [file d6fo02097f2.pdf]
